# Supplementary material
Source: HighWire-hosted journal article supplement (https://jmg.bmj.com/content/60/5/491)
Supplement: inline-supplementary-material-1 [file inline-supplementary-material-1.pdf]

| Phenotype                              | ICD10/UKB<br>code | Details                                              |
|----------------------------------------|-------------------|------------------------------------------------------|
| Renal disease (ESRD or eGFR <15)       | N180              | End stage renal disease                              |
|                                        | N185              | CKD stage 5                                          |
|                                        | T861              | Complications of kidney transplant                   |
|                                        | Z940              | Kidney transplant status                             |
|                                        | Z992              | Dependence on renal dialysis                         |
|                                        | Z492              | Other dialysis                                       |
|                                        | Z491              | Extracorporeal dialysis                              |
|                                        | Z490              | Preparatory care for dialysis                        |
|                                        | T861              | Complications of kidney transplant                   |
| Other kidney malformations             | N27               | Small kidney                                         |
|                                        | Q63               | Other congenital malformations of kidney             |
| Malformations of ureter                | Q621              | Congenital occlusion of ureter                       |
|                                        | Q622              | Congenital mega ureter                               |
|                                        | Q623              | Other obstructive defects of renal pelvis and ureter |
|                                        | Q624              | Agenesis of ureter                                   |
|                                        | Q625              | Duplication of ureter                                |
|                                        | Q626              | Malposition of ureter                                |
|                                        | Q627              | Congenital vesico-uretero-renal reflux               |
|                                        | Q628              | Other congenital malformations of ureter             |
| Kidney Cysts                           | N281              | Cyst of kidney, acquired                             |
|                                        | Q612              | Polycystic kidney, adult type                        |
| Structural malformations of the kidney | Q60               | Renal agenesis and other reduction defects of kidney |
|                                        | Q61               | Cystic kidney disease                                |
|                                        | Q620              | Congenital hydronephrosis                            |
|                                        | Q631              | Lobulated, fused and horseshoe kidney                |
| Family history of renal disease        | Z841              | Family history of disorders of kidney and ureter     |
| Disorders of kidney or ureter          | N288              | Other specified disorders of kidney and ureter       |
|                                        | N289              | Disorder of kidney and ureter, unspecified           |

|                    |       |                                                 |
|--------------------|-------|-------------------------------------------------|
| eGFR               | 30700 | Creatinine                                      |
|                    | 30720 | Cystatin C                                      |
| ACR                | 30500 | Microalbumin in urine                           |
|                    | 30510 | Creatinine (enzymatic) in urine                 |
| Diabetes           | 30750 | Glycated haemoglobin (HbA1c)                    |
|                    | 20003 | Medications - insulin, sulfonylureas, metformin |
| Years in education | 22501 | Years in education                              |
| Fluid intelligence | 20016 | Fluid intelligence                              |
| Income             | 26411 | Income                                          |
| Job class          | 20277 | Job class                                       |
| Qualifications     | 6138  | Qualifications                                  |
| Urinary biomarkers | 30500 | Microalbumin in urine                           |
|                    | 30510 | Creatinine (enzymatic) in urine                 |
|                    | 30520 | Potassium in urine                              |
|                    | 30530 | Sodium in urine                                 |
| Serum biomarkers   | 30600 | Albumin                                         |
|                    | 30610 | Alkaline phosphatase                            |
|                    | 30620 | Alanine aminotransferase                        |
|                    | 30630 | Apolipoprotein A                                |
|                    | 30640 | Apolipoprotein B                                |
|                    | 30650 | Aspartate aminotransferase                      |
|                    | 30660 | Direct bilirubin                                |
|                    | 30670 | Urea                                            |
|                    | 30680 | Calcium                                         |
|                    | 30690 | Cholesterol                                     |
|                    | 30700 | Creatinine                                      |
|                    | 30710 | C-reactive protein                              |
|                    | 30720 | Cystatin C                                      |
|                    | 30730 | Gamma glutamyltransferase                       |

|                         |       |                                    |
|-------------------------|-------|------------------------------------|
|                         | 30740 | Glucose                            |
|                         | 30750 | Glycated haemoglobin (HbA1c)       |
|                         | 30760 | HDL cholesterol                    |
|                         | 30770 | IGF-1                              |
|                         | 30780 | LDL direct                         |
|                         | 30790 | Lipoprotein A                      |
|                         | 30800 | Oestradiol                         |
|                         | 30810 | Phosphate                          |
|                         | 30820 | Rheumatoid factor                  |
|                         | 30830 | SHBG                               |
|                         | 30840 | Total bilirubin                    |
|                         | 30850 | Testosterone                       |
|                         | 30860 | Total protein                      |
|                         | 30870 | Triglycerides                      |
|                         | 30880 | Urate                              |
|                         | 30890 | Vitamin D                          |
| Poor mental state       | 2030  | Guilty feelings                    |
|                         | 1950  | Sensitivity/ hurt feelins          |
|                         | 1940  | irritability                       |
|                         | 2020  | Loneliness, isolation              |
|                         | 1930  | Miserableness                      |
|                         | 1920  | Mood swings                        |
|                         | 1970  | Nervous feelings                   |
|                         | 2040  | Risk taking                        |
|                         | 2010  | Suffer from 'nerves'               |
|                         | 1990  | Tense/'highly strung'              |
|                         | 1980  | Worrier/anxious feelings           |
|                         | 2000  | Worry too long after embarrassment |
| Intellectual disability | F70   | Mild intellectual disabilities     |
|                         | F71   | Moderate intellectual disabilities |

|                                                          |        |                                                                                                   |
|----------------------------------------------------------|--------|---------------------------------------------------------------------------------------------------|
|                                                          | F72    | Severe intellectual disabilities                                                                  |
|                                                          | F73    | Profound intellectual disabilities                                                                |
|                                                          | F78    | Other intellectual disabilities                                                                   |
|                                                          | F79    | Unspecified intellectual disabilities                                                             |
|                                                          | F800   | Phonological disorder                                                                             |
|                                                          | F801   | Expressive language disorder                                                                      |
|                                                          | F802   | Mixed receptive-expressive language disorder                                                      |
|                                                          | F804   | Speech and language developmental delay due to hearing loss                                       |
|                                                          | F808   | Other developmental disorders of speech and language                                              |
|                                                          | F809   | Developmental disorders of speech and language, unspecified                                       |
|                                                          | F810   | Specific reading disorder                                                                         |
|                                                          | F812   | Mathematics disorder                                                                              |
|                                                          | F818   | Other developmental disorders of scholastic skills                                                |
|                                                          | F819   | Developmental disorders of scholastic skills, unspecified                                         |
|                                                          | F82    | Specific developmental disorder of motor function                                                 |
| Visited healthcare professional for psychiatric disorder | 2090   | Seen GP for nerves, anxiety, tension or depression                                                |
|                                                          | 2100   | Seen a psychiatrist for nerves, anxiety, tension or depression                                    |
| Epilepsy                                                 | 131048 | Date G40 first reported (epilepsy)                                                                |
|                                                          | G400   | Localisation related idiopathic epilepsy and epileptic syndromes with seizures of localised onset |
|                                                          | G401   | Localisation related idiopathic epilepsy and epileptic syndromes with simple partial seizures     |
|                                                          | G402   | Localisation related idiopathic epilepsy and epileptic syndromes with complex partial seizures    |
|                                                          | G403   | Generalised idiopathic epilepsy and epileptic syndromes                                           |
|                                                          | G404   | Other generalised epilepsy and epileptic syndromes                                                |
|                                                          | G408   | Other epilepsy and recurrent seizures                                                             |
|                                                          | G409   | Epilepsy, unspecified                                                                             |
|                                                          | G40A   | Absence epileptic syndrome                                                                        |

|                         |       |                                                                                  |
|-------------------------|-------|----------------------------------------------------------------------------------|
| Schizophrenia           | F20   | Schizophrenia                                                                    |
|                         | F21   | schizotypal disorder                                                             |
|                         | F22   | Delusional disorders                                                             |
|                         | F23   | Brief psychotic disorder                                                         |
|                         | F24   | Shared psychotic disorder                                                        |
|                         | F25   | Schizoaffective disorders                                                        |
|                         | F28   | Other psychotic disorder not due to a substance or known physiological condition |
|                         | F29   | Unspecified psychosis not due to a substance or known physiological condition    |
| Bipolar                 | F30   | Manic episode                                                                    |
|                         | F31   | Bipolar disorder                                                                 |
|                         | F32   | Major depressive disorder, single episode                                        |
|                         | F33   | Major depressive disorder, recurrent                                             |
|                         | F34   | Persistent mood [affective] disorders                                            |
|                         | F38   | Other mood affective disorder                                                    |
|                         | F39   | Unspecified mood affective disorder                                              |
|                         | 20122 | Bipolar disorder status                                                          |
| Congenital malformation | Q0    | Nervous system                                                                   |
|                         | Q1    | Eye, ear, face, neck                                                             |
|                         | Q2    | Circulatory system                                                               |
|                         | Q3    | Respiratory system, cleft lip and palate                                         |
|                         | Q4    | Digestive system                                                                 |
|                         | Q5    | Genital organs                                                                   |
|                         | Q6    | Urinary system                                                                   |
|                         | Q7    | Musculoskeletal system                                                           |
|                         | Q8    | Other                                                                            |
|                         | Q9    | Chromosomal abnormalities, not elsewhere classified                              |
| Pervasive               | F840  | Autistic disorder                                                                |
|                         | F842  | Rett's syndrome                                                                  |
|                         | F843  | Other childhood disintegrative disorder                                          |

|                     |          |                                                          |
|---------------------|----------|----------------------------------------------------------|
|                     | F845     | Asperger's syndrome                                      |
|                     | F848     | Other pervasive developmental disorders                  |
|                     | F849     | Pervasive developmental disorder, unspecified            |
| Developmental delay | As above | Bipolar                                                  |
|                     | As above | Schizophrenia                                            |
|                     | As above | Pervasive                                                |
|                     | As above | Visited healthcare professional for psychiatric disorder |
|                     | As above | Intellectual disability                                  |
|                     | As above | Malformation                                             |
|                     | As above | Epilepsy                                                 |

Supplementary table 1 – Phenotype definitions

| Category           | UKB background |               |         |       |         | 17q12 Microdeletion |               |    |       |       | 17q12 Microduplication |               |     |       |       |
|--------------------|----------------|---------------|---------|-------|---------|---------------------|---------------|----|-------|-------|------------------------|---------------|-----|-------|-------|
|                    | Mean           | 95%CI         | n       | %     | Total   | Mean                | 95%CI         | n  | %     | Total | Mean                   | 95%CI         | n   | %     | Total |
| Participants       | -              | -             | 450,879 | 89.75 | 502,371 | -                   | -             | 10 | 90.91 | 11    | -                      | -             | 100 | 94.34 | 106   |
| Sex (male)         | -              | -             | 206,140 | 45.72 | 450,879 | -                   | -             | 5  | 50    | 10    | -                      | -             | 6   | 60    | 100   |
| Age (years)        | 57.28          | 57.26-57.31   | -       | -     | 450,879 | 52.58               | 46.22-58.93   | -  | -     | 10    | 56.84                  | 55.19-58.48   | -   | -     | 100   |
| BMI                | 27.40          | 27.38-27.41   | -       | -     | 449,140 | 24.87               | 22.86-26.88   | -  | -     | 10    | 28.35                  | 27.27-29.43   | -   | -     | 100   |
| Diabetes           | -              | -             | 30,191  | 6.70  | 450,879 | -                   | -             | 6  | 60    | 10    | -                      | -             | 9   | 9     | 100   |
| eGFR               | 92.72          | 92.67-92.77   | -       | -     | 429,395 | 63.95               | 50.59-77.32   | -  | -     | 9     | 77.66                  | 73.96-81.37   | -   | -     | 94    |
| ACR                | 1.98           | 1.95-2.01     | -       | -     | 437,935 | 2.32                | 0.62-4.03     | -  | -     | 10    | 5.41                   | 1.67-9.15     | -   | -     | 95    |
| ALP                | 83.59          | 83.52-83.67   | -       | -     | 429,948 | 196.9               | 33.63-360.24  | -  | -     | 9     | 85.13                  | 80.06-90.21   | -   | -     | 94    |
| AST                | 26.21          | 26.18-26.24   | -       | -     | 428,348 | 65.74               | -12.62-144.11 | -  | -     | 9     | 27.50                  | 26.06-28.93   | -   | -     | 94    |
| ALT                | 23.54          | 23.94-23.58   | -       | -     | 429,777 | 49.24               | 12.42-86.07   | -  | -     | 9     | 24.79                  | 22.25-27.33   | -   | -     | 94    |
| GGT                | 37.37          | 37.24-37.50   | -       | -     | 429,706 | 112.0               | 10.33-213.72  | -  | -     | 9     | 40.82                  | 34.78-46.86   | -   | -     | 94    |
| Smoking            | -              | -             | 202,204 | 45.46 | 444,793 | -                   | -             | 4  | 40    | 10    | -                      | -             | 50  | 51.02 | 98    |
| Obesity            | -              | -             | 110,326 | 24.47 | 450,879 | -                   | -             | 0  | 0     | 10    | -                      | -             | 30  | 30    | 100   |
| CKD Family history | -              | -             | 61      | 0.01  | 450,879 | -                   | -             | 0  | 0     | 10    | -                      | -             | 0   | 0     | 100   |
| Hypertension       | -              | -             | 241,572 | 53.92 | 448,000 | -                   | -             | 3  | 30    | 10    | -                      | -             | 59  | 59    | 100   |
| BP medication      | -              | -             | 92,981  | 20.77 | 447,703 | -                   | -             | 3  | 30    | 10    | -                      | -             | 29  | 29    | 100   |
| Systolic BP        | 144.24         | 144.17-144.31 | -       | -     | 449,857 | 136.6               | 118.94-154.26 | -  | -     | 10    | 146.36                 | 141.24-151.48 | -   | -     | 100   |
| Diastolic BP       | 86.35          | 86.64-86.69   | -       | -     | 449,857 | 88.25               | 77.83-98.37   | -  | -     | 10    | 87.52                  | 84.69-90.35   | -   | -     | 100   |
| ESRD               | -              | -             | 1,339   | 0.30  | 450,879 | -                   | -             | 1  | 10    | 10    | -                      | -             | 2   | 2     | 100   |

**Supplementary Table 2 – Cohort clinical characteristics.** UKB background = EU ancestry excluding; 17q12 microdeletions, microduplications and *HNF1B*

pathogenic mutations. Age = age at recruitment to UKB study. Smoking = if participants had ever smoked. Obesity calculated from BMI. Hypertension based on blood pressure medications and blood pressure. ESRD = eGFR < 15 plus participants with renal replacement therapies; ALP = alkaline phosphatase; AST = aspartate amino transferase; ALT = alanine aminotransferase; GGT = gamma-glutamyl transferase;
